# Supplementary material for: Integration of functionalized two-dimensional TaS2 nanosheets and an electron mediator for more efficient biocatalyzed artificial photosynthesis
Source: Royal Society of Chemistry journal article supplement (doi:10.1039/c7ta00002b), 2017-01-01
Supplement: c7ta00002b1.pdf [file c7ta00002b1.pdf]

## Supporting Information

# Integration of Functionalized Two-Dimensional TaS<sub>2</sub> Nanosheets and Electron Mediator for More Efficient Biocatalyzed Artificial Photosynthesis

*Xiaoyuan Ji, Cuicui Liu, Jie Wang, Zhiguo Su, Guanghui Ma, Songping Zhang\**

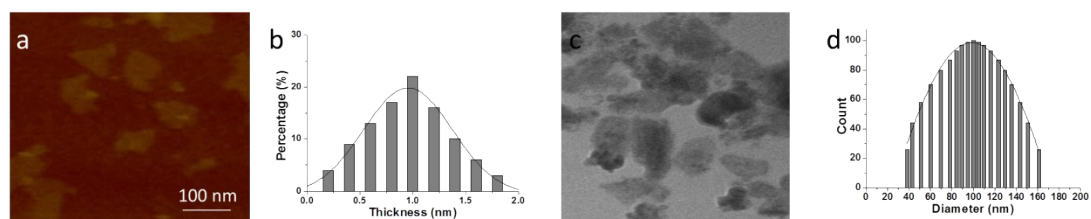

**Figure S1.** Characterization of as-made TaS<sub>2</sub> nanosheets dispersed in NMP. (a) AFM image, (b) thickness, (c) TEM image, and (d) size distribution.

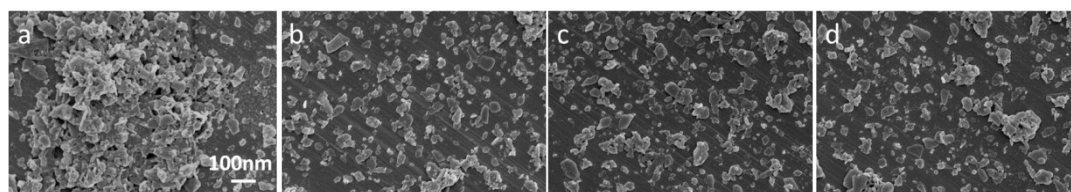

**Figure S2.** Scanning electronic microscope (SEM) images of (a) TaS<sub>2</sub>, (b) TaS<sub>2</sub>-PEG, (c) TaS<sub>2</sub>-PEG-GR and (d) TaS<sub>2</sub>-PEG-GR-M.

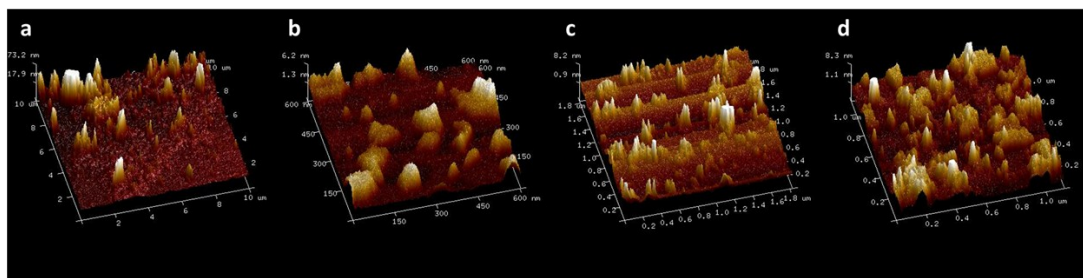

**Figure S3.** Atomic-force microscopy (AFM) 3D images of (a) TaS<sub>2</sub>, (b) TaS<sub>2</sub>-PEG, (c) TaS<sub>2</sub>-PEG-GR and (d) TaS<sub>2</sub>-PEG-GR-M.

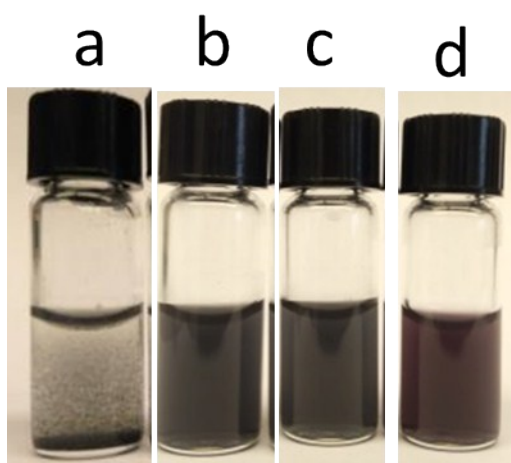

**Figure S4.** Photo images of (a) TaS<sub>2</sub>, (b) TaS<sub>2</sub>-PEG, (c) TaS<sub>2</sub>-PEG-GR and (d) TaS<sub>2</sub>-PEG-GR-M after storing in room temperature for one week.

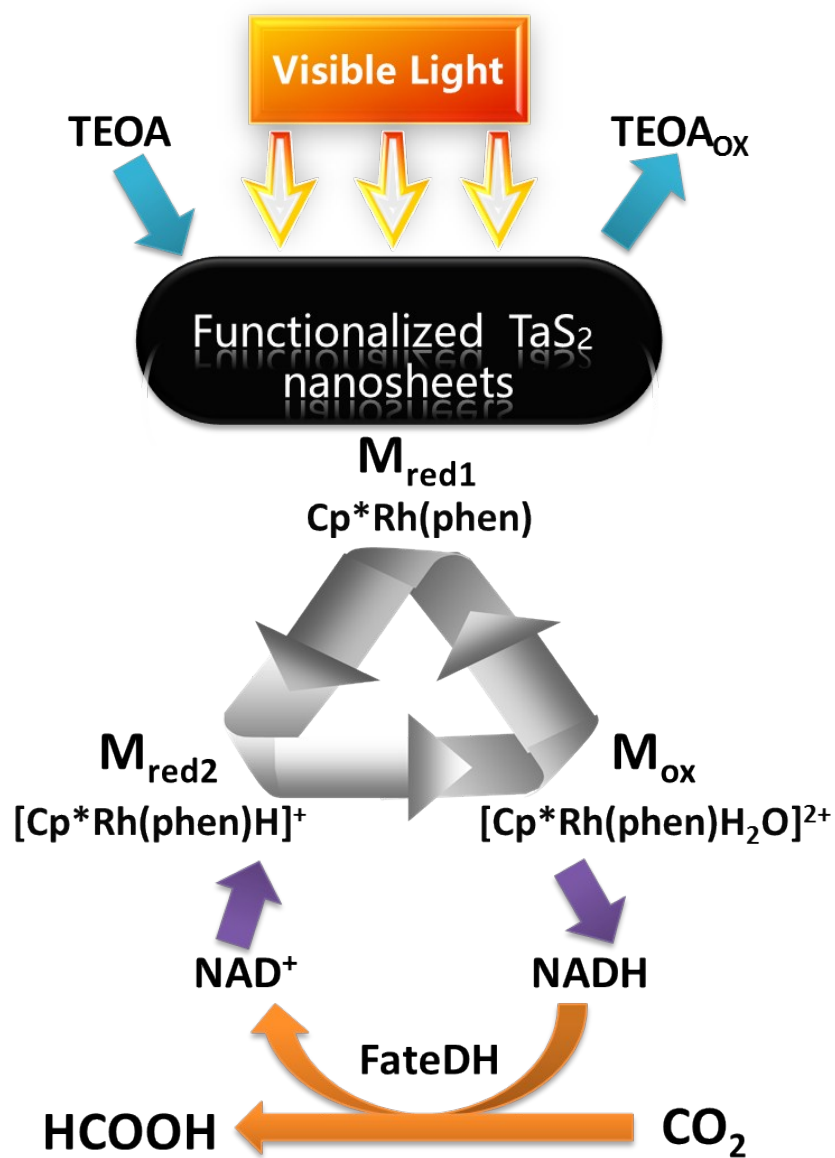

**Figure S5.** Schematic illustration of functionalized TaS<sub>2</sub> nanosheets-sensitized photo-regeneration of NADH

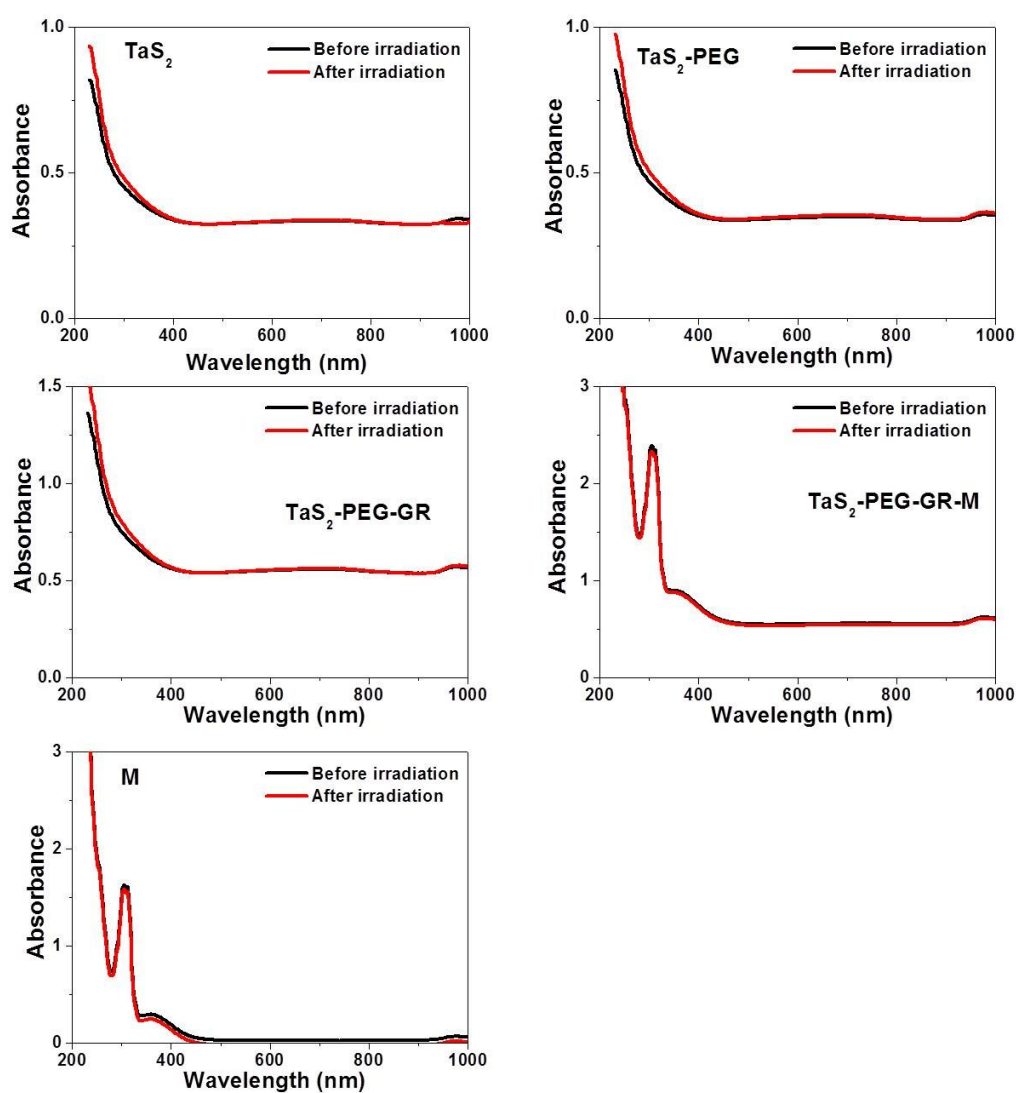

**Figure S6.** UV-vis-NIR absorbance spectra of TaS<sub>2</sub> nanosheets and its functionalized derivatives, as well as the electron mediator M before and after being exposed to 5 h's irradiation of 450 W Xenon lamp with a 420 nm cut-off-filter. In all cases, the concentrations of TaS<sub>2</sub> and M were adjusted to the same level as used in the photo-enzymatic experiments, at 0.3 mg/mL and 0.25 mM, respectively.

**Table S1.** Element content of TaS<sub>2</sub>-PEG-GR-M analyzed from EDS mapping

| Element | Weight% | Atomic % |
|---------|---------|----------|
| C       | 29.76   | 64.46    |
| O       | 10.2    | 16.57    |
| S       | 14.67   | 11.92    |
| Ta      | 40.48   | 5.81     |
| Rh      | 4.9     | 1.24     |
| Total   | 100     | 100      |

**Table S2.** The yields of NADH regenerated from NAD<sup>+</sup> after 120 mins' irradiation by applying different concentration of TaS<sub>2</sub> nanosheets

| Concentration of TaS <sub>2</sub> (mg/mL) | Yield of NADH (%) |
|-------------------------------------------|-------------------|
| 0.1                                       | 20.2±3.0          |
| 0.2                                       | 30.2±1.7          |
| 0.3                                       | 39.7±1.9          |
| 0.4                                       | 42.5±2.0          |

**Table S3.** The yield of regenerated NADH and synthesized formic acid concentration by using different functionalized TaS<sub>2</sub> nanosheets

| Photocatalyst              | Electron mediator | Yield of NADH (%) | Concentration of formic acid (mM) |
|----------------------------|-------------------|-------------------|-----------------------------------|
| TaS <sub>2</sub>           | Free M            | 39.7±1.9          | 40.7±2.4                          |
| TaS <sub>2</sub> -PEG      | Free M            | 54.6±1.8          | 64.9±3.2                          |
| TaS <sub>2</sub> -PEG-GR   | Free M            | 64.2±2.9          | 74.4±2.6                          |
| TaS <sub>2</sub> -PEG-GR-M | (Integrated)      | 83.9±2.2          | 101.4±3.5                         |

**Table S4.** The cathodic peak current and reduction potential at cathodic peak current of M, TaS<sub>2</sub> or its derivatives (TaS<sub>2</sub>-PEG, TaS<sub>2</sub>-PEG-GR) solution and mixture of two components in the absence and presence of NAD<sup>+</sup>

| Sample                                      | Reduction potential at cathodic peak current (V) | Cathodic peak current (μA) |
|---------------------------------------------|--------------------------------------------------|----------------------------|
| M                                           | -0.70                                            | -8.44                      |
| TaS <sub>2</sub>                            | -0.90                                            | -11.28                     |
| TaS <sub>2</sub> +M                         | -0.82                                            | -11.41                     |
| TaS <sub>2</sub> +M+NAD <sup>+</sup>        | -0.80                                            | -19.04                     |
| TaS <sub>2</sub> -PEG                       | -0.91                                            | -11.03                     |
| TaS <sub>2</sub> -PEG+M                     | -0.83                                            | -11.63                     |
| TaS <sub>2</sub> -PEG+M+NAD <sup>+</sup>    | -0.82                                            | -20.21                     |
| TaS <sub>2</sub> -PEG-GR                    | -0.92                                            | -11.21                     |
| TaS <sub>2</sub> -PEG-GR+M                  | -0.81                                            | -12.25                     |
| TaS <sub>2</sub> -PEG-GR+M+NAD <sup>+</sup> | -0.83                                            | -22.91                     |
| TaS <sub>2</sub> -PEG-GR-M                  | -0.81                                            | -13.87                     |
| TaS <sub>2</sub> -PEG-GR-M+NAD <sup>+</sup> | -0.87                                            | -32.03                     |
